# Supplementary material for: Structural basis of ribosomal peptide macrocyclization in plants
Source: eLife journal article supplement (doi:10.7554/elife.32955), 2018-01-31
Supplement: supp [file elife-32955-supp-v1.zip]

Archive with 11 entries (11 files):
- elife_poa_e32955_Figure_3_figure_supplement_1.pdf
- elife_poa_e32955_Figure_2_figure_supplement_2.pdf
- elife_poa_e32955_Figure_4_figure_supplement_1.pdf
- elife_poa_e32955_Figure_4_figure_supplement_3.pdf
- elife_poa_e32955_Figure_2_figure_supplement_1.pdf
- elife_poa_e32955_Figure_3_figure_supplement_2.pdf
- elife_poa_e32955_Figure_4_figure_supplement_2.pdf
- elife_poa_e32955_Figure_4_figure_supplement_4.pdf
- elife_poa_e32955_Transparent_Reporting_File.pdf
- elife_poa_e32955_Figure_2_figure_supplement_3.pdf
- elife_poa_e32955_Figure_5_figure_supplement_1.pdf
