# Supplementary material for: Structural basis of ribosomal peptide macrocyclization in plants
Source: eLife journal article supplement (doi:10.7554/elife.32955), 2018-01-31
Supplement: supp [file elife-32955-supp-v1.zip › elife_poa_e32955_Figure_2_figure_supplement_2.pdf]

|            | 1  | 10 | 20              | 30      | 40    | 50          | 60       | 70          | 80      |         |          |          |          |          |          |        |         |         |         |         |         |         |        |       |         |     |        |    |
|------------|----|----|-----------------|---------|-------|-------------|----------|-------------|---------|---------|----------|----------|----------|----------|----------|--------|---------|---------|---------|---------|---------|---------|--------|-------|---------|-----|--------|----|
| A0A0G2RI59 | .. | .. | MVSRIICFTL      | VLVTVA  | LSY   | GAAGRESSGGQ | KWRWGWDP | LIRSPVDAEQE | ..      | ..      | VDEQMTNG | TK       | WAVLV    | AG       | SKG      | YGN    | YRHO    | AD      | VCHAY   | OV      |         |         |        |       |         |     |        |    |
| P49044     | .. | .. | MGSSQLSTLFFT    | IVTFLT  | TV    | SSGRD       | ..       | LPGDYLRLP   | STSRF   | ..      | FREPKNDD | DFEG     | TR       | WAILL    | AG       | SSG    | YNNYRHO | AD      | VCHAY   | OV      |         |         |        |       |         |     |        |    |
| P49047     | .. | .. | MTIVVSFL        | ALFLF   | ..    | LVAA        | ..       | VSGDVIKLP   | LSASKF  | ..      | FRPTNDDD | S        | TK       | WAVLV    | AG       | SSG    | YNNYRHO | AD      | VCHAY   | OV      |         |         |        |       |         |     |        |    |
| B8ASK4     | .. | .. | MAARCVWVG       | VVALLA  | VAA   | AADGE       | ..       | EEEGKVE     | PLIRMT  | TEEGG   | DAEAAAP  | PAPAPAA  | AAAYDGG  | TR       | WAVLV    | AG     | SSG     | YNNYRHO | AD      | VCHACO  | OV      |         |        |       |         |     |        |    |
| P49042     | .. | .. | METHKSLFFFTNYVL | FLVFT   | LMS   | FLPIP       | GLLAS    | ..          | RLNPFEP | PGILMT  | TEEAEPVQ | ..       | VDDDDQ   | LGT      | TR       | WAVLV  | AG      | SMG     | FGN     | YRHO    | AD      | VCHAY   | OV     |       |         |     |        |    |
| O24326     | .. | .. | MAVHRSLLNKP     | TWCRVAF | WWMW  | LVM         | VMRIQ    | G           | ..      | TNGKQDS | VIKLP    | TOEV     | ..       | DAESDEVG | TR       | WAVLV  | AG      | SSG     | YNNYRHO | AD      | VCHAY   | OV      |        |       |         |     |        |    |
| P49046     | .. | .. | ..              | ..      | MVM   | MLV         | MLSH     | G           | TAAR    | ..      | LNRREWD  | SVIQ     | LPT      | TEPV     | ..       | D      | DEVG    | TR      | WAVLV   | AG      | SSG     | YNNYRHO | AD     | VCHAY | OV      |     |        |    |
| P49045     | .. | .. | MALDRSII        | SKTTWYS | VVLWM | MVV         | LVRVH    | G           | AAAR    | ..      | PNRKEWD  | SVIKLP   | TEPV     | ..       | DAESDEVG | TR     | WAVLV   | AG      | SSG     | YNNYRHO | AD      | VCHAY   | OV     |       |         |     |        |    |
| Q9R0J8     | .. | .. | ..              | ..      | MTWR  | VAV         | LLSLVL   | GAGA        | ..      | ..      | VHIGVDD  | DPEDGGKH | WV       | IV       | VAG      | SSG    | YNNYRHO | AD      | ACHAY   | OV      |         |         |        |       |         |     |        |    |
| O89017     | .. | .. | ..              | ..      | MTWR  | VAV         | LLSLVL   | GAGA        | ..      | ..      | VPVGVDD  | DPEDGGKH | WV       | IV       | VAG      | SSG    | YNNYRHO | AD      | ACHAY   | OV      |         |         |        |       |         |     |        |    |
| Q99538     | .. | .. | ..              | ..      | MVWK  | VAV         | FLSVAL   | GIGA        | ..      | ..      | VP       | IDDD     | DPEDGGKH | WV       | IV       | VAG    | SSG     | YNNYRHO | AD      | ACHAY   | OV      |         |        |       |         |     |        |    |
| Q5R5D9     | .. | .. | ..              | ..      | MVWK  | VAV         | FLSVAL   | GIGA        | ..      | ..      | VP       | IDDD     | DPEDGGKH | WV       | IV       | VAG    | SSG     | YNNYRHO | AD      | ACHAY   | OV      |         |        |       |         |     |        |    |
| Q95M12     | .. | .. | ..              | ..      | MIWET | V           | LLSLVL   | GTGA        | ..      | ..      | VP       | LED      | DPEDGGKH | WV       | IV       | VAG    | SSG     | YNNYRHO | AD      | ACHAY   | OV      |         |        |       |         |     |        |    |
| P49048     | .. | .. | ..              | ..      | MFNI  | MLVKFV      | FAL      | L           | ASCR    | VEAD    | ..       | NTSVLP   | EGFVD    | ..       | AAQRSTHT | NN     | WAVLV   | CT      | SRF     | WNNYRHO | VAN     | LSVYRS  | OV     |       |         |     |        |    |
| Q8T4E1     | .. | .. | ..              | ..      | MAAPC | F           | LT       | ..          | LRVAT   | LAAL    | ALL      | SIG      | ..       | ..       | QFFRS    | GHTN   | NN      | WAVLV   | CT      | SRF     | WNNYRHO | VAN     | LSVYRS | OV    |         |     |        |    |
| Q9CX9Y     | .. | .. | ..              | ..      | MAVTD | SL          | S        | ..          | RAATV   | LATV    | LL       | SFG      | ..       | ..       | QFFRS    | GHTN   | NN      | WAVLV   | CT      | SRF     | WNNYRHO | VAN     | LSVYRS | OV    |         |     |        |    |
| Q92643     | .. | .. | ..              | ..      | MAVTD | SL          | S        | ..          | RAATV   | LATV    | LL       | SFG      | ..       | ..       | QFFRS    | GHTN   | NN      | WAVLV   | CT      | SRF     | WNNYRHO | VAN     | LSVYRS | OV    |         |     |        |    |
| S5R6L8     | .. | .. | ..              | ..      | MAVTD | SL          | S        | ..          | RAATV   | LATV    | LL       | SFG      | ..       | ..       | QFFRS    | GHTN   | NN      | WAVLV   | CT      | SRF     | WNNYRHO | VAN     | LSVYRS | OV    |         |     |        |    |
| Q3MHZ7     | .. | .. | ..              | ..      | MVD   | T           | C        | F           | L       | S       | ..       | RG       | L        | T        | ..       | LAASOI | EDQAE   | ..      | QFFRS   | GHTN    | NN      | WAVLV   | CT     | SRF   | WNNYRHO | VAN | LSVYRS | OV |
| Q4KRv1     | .. | .. | ..              | ..      | MVG   | T           | W        | F           | L       | C       | ..       | RG       | F        | T        | ..       | LAASOI | EDQAE   | ..      | QFFRS   | GHTN    | NN      | WAVLV   | CT     | SRF   | WNNYRHO | VAN | LSVYRS | OV |

|            | 90 |   |   |   |   |   |   |   |   |   | 100 |   |   |   |   |   |   |   |   |   | 110 |   |   |   |   |   |   |   |   |   | 120 |   |   |   |   |   |   |   |   |   | 130 |   |   |   |   |   |   |   |   |   | 140 |   |   |   |   |   |   |   |   |   | 150 |   |   |   |   |   |   |   |   |   | 160 |   |   |   |   |   |   |   |   |   | 170 |   |   |   |   |   |   |   |   |   | 180 |   |   |   |   |   |  |  |  |  | 190 |  |  |  |  |  |  |  |  |  |
|------------|----|---|---|---|---|---|---|---|---|---|-----|---|---|---|---|---|---|---|---|---|-----|---|---|---|---|---|---|---|---|---|-----|---|---|---|---|---|---|---|---|---|-----|---|---|---|---|---|---|---|---|---|-----|---|---|---|---|---|---|---|---|---|-----|---|---|---|---|---|---|---|---|---|-----|---|---|---|---|---|---|---|---|---|-----|---|---|---|---|---|---|---|---|---|-----|---|---|---|---|---|--|--|--|--|-----|--|--|--|--|--|--|--|--|--|
| A0A0G2R159 | L  | R | K | K | G | G | K | D | E | N | I   | V | F | V | M | Y | D | I | A | K | S   | E | M | N | P | R | P | G | I | I | N   | S | P | K | E | D | V | Y | A | G | V   | P | K | V | T | G | N | V | D | N | L   | S | A | V | L | L | G | R | S | A | V   | K | G | S | G | S | K | V | V | D | S   | K | P | E | D | R | I | F | L | F | Y   | S | D | H | G | G | P | G | V | L | G   | M | P | N | F | L |  |  |  |  |     |  |  |  |  |  |  |  |  |  |
| P49044     | L  | R | K | K | G | G | K | D | E | N | I   | V | F | V | M | Y | D | I | A | K | S   | E | M | N | P | R | P | G | I | I | N   | S | P | K | E | D | V | Y | A | G | V   | P | K | V | T | G | N | V | D | N | L   | S | A | V | L | L | G | R | S | A | V   | K | G | S | G | S | K | V | V | D | S   | K | P | E | D | R | I | F | L | F | Y   | S | D | H | G | G | P | G | V | L | G   | M | P | N | F | L |  |  |  |  |     |  |  |  |  |  |  |  |  |  |
| P49047     | L  | R | K | K | G | G | K | D | E | N | I   | V | F | V | M | Y | D | I | A | K | S   | E | M | N | P | R | P | G | I | I | N   | S | P | K | E | D | V | Y | A | G | V   | P | K | V | T | G | N | V | D | N | L   | S | A | V | L | L | G | R | S | A | V   | K | G | S | G | S | K | V | V | D | S   | K | P | E | D | R | I | F | L | F | Y   | S | D | H | G | G | P | G | V | L | G   | M | P | N | F | L |  |  |  |  |     |  |  |  |  |  |  |  |  |  |
| B8ASK4     | L  | R | K | K | G | G | K | D | E | N | I   | V | F | V | M | Y | D | I | A | K | S   | E | M | N | P | R | P | G | I | I | N   | S | P | K | E | D | V | Y | A | G | V   | P | K | V | T | G | N | V | D | N | L   | S | A | V | L | L | G | R | S | A | V   | K | G | S | G | S | K | V | V | D | S   | K | P | E | D | R | I | F | L | F | Y   | S | D | H | G | G | P | G | V | L | G   | M | P | N | F | L |  |  |  |  |     |  |  |  |  |  |  |  |  |  |
| P49042     | L  | R | K | K | G | G | K | D | E | N | I   | V | F | V | M | Y | D | I | A | K | S   | E | M | N | P | R | P | G | I | I | N   | S | P | K | E | D | V | Y | A | G | V   | P | K | V | T | G | N | V | D | N | L   | S | A | V | L | L | G | R | S | A | V   | K | G | S | G | S | K | V | V | D | S   | K | P | E | D | R | I | F | L | F | Y   | S | D | H | G | G | P | G | V | L | G   | M | P | N | F | L |  |  |  |  |     |  |  |  |  |  |  |  |  |  |
| O24326     | L  | I | K | K | G | G | K | D | E | N | I   | V | F | V | M | Y | D | I | A | K | S   | E | M | N | P | R | P | G | I | I | N   | S | P | K | E | D | V | Y | A | G | V   | P | K | V | T | G | N | V | D | N | L   | S | A | V | L | L | G | R | S | A | V   | K | G | S | G | S | K | V | V | D | S   | K | P | E | D | R | I | F | L | F | Y   | S | D | H | G | G | P | G | V | L | G   | M | P | N | F | L |  |  |  |  |     |  |  |  |  |  |  |  |  |  |
| P49046     | L  | I | K | K | G | G | K | D | E | N | I   | V | F | V | M | Y | D | I | A | K | S   | E | M | N | P | R | P | G | I | I | N   | S | P | K | E | D | V | Y | A | G | V   | P | K | V | T | G | N | V | D | N | L   | S | A | V | L | L | G | R | S | A | V   | K | G | S | G | S | K | V | V | D | S   | K | P | E | D | R | I | F | L | F | Y   | S | D | H | G | G | P | G | V | L | G   | M | P | N | F | L |  |  |  |  |     |  |  |  |  |  |  |  |  |  |
| P49045     | L  | I | K | K | G | G | K | D | E | N | I   | V | F | V | M | Y | D | I | A | K | S   | E | M | N | P | R | P | G | I | I | N   | S | P | K | E | D | V | Y | A | G | V   | P | K | V | T | G | N | V | D | N | L   | S | A | V | L | L | G | R | S | A | V   | K | G | S | G | S | K | V | V | D | S   | K | P | E | D | R | I | F | L | F | Y   | S | D | H | G | G | P | G | V | L | G   | M | P | N | F | L |  |  |  |  |     |  |  |  |  |  |  |  |  |  |
| Q9R0J8     | I  | H | R | N | G | P | D | S | I | V | L   | M | L | A | D | I | A | N | E | E | N   | P | P | F | G | V | I | N | R | N | P   | K | E | D | V | Y | A | G | V | P | K   | V | T | G | N | V | D | N | L | S | A   | V | L | L | G | R | S | A | V | K | G   | S | G | S | K | V | V | D | S | K | P   | E | D | R | I | F | L | F | Y | S | D   | H | G | G | P | G | V | L | G | M | P   | N | F | L |   |   |  |  |  |  |     |  |  |  |  |  |  |  |  |  |
| O89017     | I  | H | R | N | G | P | D | S | I | V | L   | M | L | A | D | I | A | N | E | E | N   | P | P | F | G | V | I | N | R | N | P   | K | E | D | V | Y | A | G | V | P | K   | V | T | G | N | V | D | N | L | S | A   | V | L | L | G | R | S | A | V | K | G   | S | G | S | K | V | V | D | S | K | P   | E | D | R | I | F | L | F | Y | S | D   | H | G | G | P | G | V | L | G | M | P   | N | F | L |   |   |  |  |  |  |     |  |  |  |  |  |  |  |  |  |
| Q9Y538     | I  | H | R | N | G | P | D | S | I | V | L   | M | L | A | D | I | A | N | E | E | N   | P | P | F | G | V | I | N | R | N | P   | K | E | D | V | Y | A | G | V | P | K   | V | T | G | N | V | D | N | L | S | A   | V | L | L | G | R | S | A | V | K | G   | S | G | S | K | V | V | D | S | K | P   | E | D | R | I | F | L | F | Y | S | D   | H | G | G | P | G | V | L | G | M | P   | N | F | L |   |   |  |  |  |  |     |  |  |  |  |  |  |  |  |  |
| Q5R5D9     | I  | H | R | N | G | P | D | S | I | V | L   | M | L | A | D | I | A | N | E | E | N   | P | P | F | G | V | I | N | R | N | P   | K | E | D | V | Y | A | G | V | P | K   | V | T | G | N | V | D | N | L | S | A   | V | L | L | G | R | S | A | V | K | G   | S | G | S | K | V | V | D | S | K | P   | E | D | R | I | F | L | F | Y | S | D   | H | G | G | P | G | V | L | G | M | P   | N | F | L |   |   |  |  |  |  |     |  |  |  |  |  |  |  |  |  |
| Q9S12      | V  | H | R | N | G | P | D | S | I | V | L   | M | L | A | D | I | A | N | E | E | N   | P | P | F | G | V | I | N | R | N | P   | K | E | D | V | Y | A | G | V | P | K   | V | T | G | N | V | D | N | L | S | A   | V | L | L | G | R | S | A | V | K | G   | S | G | S | K | V | V | D | S | K | P   | E | D | R | I | F | L | F | Y | S | D   | H | G | G | P | G | V | L | G | M | P   | N | F | L |   |   |  |  |  |  |     |  |  |  |  |  |  |  |  |  |
| P49048     | I  | K | R | I | K | P | D | S | I | V | L   | M | L | A | D | I | A | N | E | E | N   | P | P | F | G | V | I | N | R | N | P   | K | E | D | V | Y | A | G | V | P | K   | V | T | G | N | V | D | N | L | S | A   | V | L | L | G | R | S | A | V | K | G   | S | G | S | K | V | V | D | S | K | P   | E | D | R | I | F | L | F | Y | S | D   | H | G | G | P | G | V | L | G | M | P   | N | F | L |   |   |  |  |  |  |     |  |  |  |  |  |  |  |  |  |
| Q8T4E1     | V  | K | R | I | K | P | D | S | I | V | L   | M | L | A | D | I | A | N | E | E | N   | P | P | F | G | V | I | N | R | N | P   | K | E | D | V | Y | A | G | V | P | K   | V | T | G | N | V | D | N | L | S | A   | V | L | L | G | R | S | A | V | K | G   | S | G | S | K | V | V | D | S | K | P   | E | D | R | I | F | L | F | Y | S | D   | H | G | G | P | G | V | L | G | M | P   | N | F | L |   |   |  |  |  |  |     |  |  |  |  |  |  |  |  |  |
| Q9CXY9     | V  | K | R | I | K | P | D | S | I | V | L   | M | L | A | D | I | A | N | E | E | N   | P | P | F | G | V | I | N | R | N | P   | K | E | D | V | Y | A | G | V | P | K   | V | T | G | N | V | D | N | L | S | A   | V | L | L | G | R | S | A | V | K | G   | S | G | S | K | V | V | D | S | K | P   | E | D | R | I | F | L | F | Y | S | D   | H | G | G | P | G | V | L | G | M | P   | N | F | L |   |   |  |  |  |  |     |  |  |  |  |  |  |  |  |  |
| Q92643     | V  | K | R | I | K | P | D | S | I | V | L   | M | L | A | D | I | A | N | E | E | N   | P | P | F | G | V | I | N | R | N | P   | K | E | D | V | Y | A | G | V | P | K   | V | T | G | N | V | D | N | L | S | A   | V | L | L | G | R | S | A | V | K | G   | S | G | S | K | V | V | D | S | K | P   | E | D | R | I | F | L | F | Y | S | D   | H | G | G | P | G | V | L | G | M | P   | N | F | L |   |   |  |  |  |  |     |  |  |  |  |  |  |  |  |  |
| Q5R6L8     | V  | K | R | I | K | P | D | S | I | V | L   | M | L | A | D | I | A | N | E | E | N   | P | P | F | G | V | I | N | R | N | P   | K | E | D | V | Y | A | G | V | P | K   | V | T | G | N | V | D | N | L | S | A   | V | L | L | G | R | S | A | V | K | G   | S | G | S | K | V | V | D | S | K | P   | E | D | R | I | F | L | F | Y | S | D   | H | G | G | P | G | V | L | G | M | P   | N | F | L |   |   |  |  |  |  |     |  |  |  |  |  |  |  |  |  |
| Q3MHZ7     | V  | K | R | I | K | P | D | S | I | V | L   | M | L | A | D | I | A | N | E | E | N   | P | P | F | G | V | I | N | R | N | P   | K | E | D | V | Y | A | G | V | P | K   | V | T | G | N | V | D | N | L | S | A   | V | L | L | G | R | S | A | V | K | G   | S | G | S | K | V | V | D | S | K | P   | E | D | R | I | F | L | F | Y | S | D   | H | G | G | P | G | V | L | G | M | P   | N | F | L |   |   |  |  |  |  |     |  |  |  |  |  |  |  |  |  |
| Q4KR1      | V  | K | R | I | K | P | D | S | I | V | L   | M | L | A | D | I | A | N | E | E | N   | P | P | F | G | V | I | N | R | N | P   | K | E | D | V | Y | A | G | V | P | K   | V | T | G | N | V | D | N | L | S | A   | V | L | L | G | R | S | A | V | K | G   | S | G | S | K | V | V | D | S | K | P   | E | D | R | I | F | L | F | Y | S | D   | H | G | G | P | G | V | L | G | M | P   | N | F | L |   |   |  |  |  |  |     |  |  |  |  |  |  |  |  |  |

|            | 200           | 210         | 220             | 230                   | 240             | 250         | 260               | 270       | 280                     | 290                                       |               |               |                   |                   |                   |
|------------|---------------|-------------|-----------------|-----------------------|-----------------|-------------|-------------------|-----------|-------------------------|-------------------------------------------|---------------|---------------|-------------------|-------------------|-------------------|
| A0A0G2RI59 | H L V A K     | D L V D V L | K K K H A M G T | Y K S E M V I Y       | L E A C E S     | G S I F E G | I L P E D L N     | I Y A T T | A S G A                 | N S Y G T Y C P G T F P S P P P E Y I T C | G D L . . .   | Y S V A M E D | S E T H N         | L K K E           | S L E Q F         |
| P49044     | Y L Y A S     | L N E V L   | K K K H A S G T | Y K S L V F Y L       | L E A C E S     | G S I F E G | L L P D D L N     | I Y A T T | A S N A N               | N S W G Y Y C P G D K P P P P E Y S T C   | G D L . . .   | Y S V A M E D | S E V H N         | L Q T E           | S L Q Q Y         |
| P49047     | N L Y A N     | L N D V L   | K K K Y A S G T | Y K S L V F Y L       | L E A C E S     | G S I F E G | L L P E G L N     | I Y A T T | A S N A N               | N S W G T Y C P G E D F S P P S E Y E T C | G D L . . .   | Y S V A M E D | S E K H N         | L Q T E           | L T L H K Q Y     |
| B8ASK4     | Y L Y A C     | G F I K V L | Q K K H A S N T | Y K M V I Y           | L E A C E S     | G S I F E G | L M P E N L N     | I Y V T T | A S N A V               | N S W G T Y C P G E E F S P P P E Y I T C | G D M . . .   | Y S V A M E D | S E T H N         | L K K E           | T I E D Q Y       |
| P49042     | Y L Y A M     | F I E V L   | K K K H A A G G | Y K M V I Y           | L E A C E S     | G S I F E G | I M P K D V D     | I Y V T T | A S N A N               | N S W G T Y C P G M E F S P P P E F T T C | G D L . . .   | Y S V A M E D | S E S H N         | L K K E           | T V K Q Q Y       |
| O24326     | Y L Y A M     | F I D V L   | K K K H A S G G | Y K M V I Y           | L E A C E S     | G S I F E G | I M P K D L N     | I Y V T T | A S N A N               | N S W G T Y C P G M Y P P P P E Y I T C   | G D L . . .   | Y S V A M E D | S E S H N         | L K K E           | S V E Q Q Y       |
| P49046     | F V Y A M     | F I D V L   | K K K H A S G G | Y K M V I Y           | L E A C E S     | G S I F E G | I M P K D L N     | I Y V T T | A S N A N               | N S W F G T Y C P G M N P P P P E Y V T C | G D L . . .   | Y S V A M E D | S E T H N         | L K K E           | T V Q Q Q Y       |
| P49045     | Y L Y A M     | F I D V L   | K K K H A S G T | Y K M V I Y           | L E A C E S     | G S V F E G | I M P K D L N     | I Y V T T | A S N A N               | N S W G T Y C P G M D P S P P P E Y I T C | G D L . . .   | Y S V A M E D | S E A H N         | L K K E           | S V K Q Q Y       |
| O9R0J8     | . . . L H V K | D L N K T I | R Y M Y E H K M | Y K M V F Y           | L E A C E S     | G S M M N   | . . . L P D D I D | V Y A T T | A A N P P               | N S Y A C Y Y D E . . . . .               | E R S T Y     | G D W . . .   | Y S V N M E D     | S D V E D         | L K E T L H K Q Y |
| O89017     | . . . L H V K | D L N K T I | R Y M Y E H K M | Y K M V F Y           | L E A C E S     | G S M M N   | . . . L P D D I D | V Y A T T | A A N P P               | N S Y A C Y Y D E . . . . .               | E R G T Y     | G D W . . .   | Y S V N M E D     | S D V E D         | L K E T L H K Q Y |
| O99538     | . . . L H V K | D L N E T I | H Y M Y K H K M | Y K M V F Y           | L E A C E S     | G S M M N   | . . . L P D D I N | V Y A T T | A A N P P               | N S Y A C Y Y D E . . . . .               | K R S T Y     | G D W . . .   | Y S V N M E D     | S D V E D         | L K E T L H K Q Y |
| O595D9     | . . . L H V E | D L N E T I | H Y M Y K H K M | Y K M V F Y           | L E A C E S     | G S M M N   | . . . L P D D I N | V Y A T T | A A N P P               | N S Y A C Y Y D E . . . . .               | K R S T Y     | G D W . . .   | Y S V N M E D     | S D V E D         | L K E T L H K Q Y |
| O95M12     | . . . L H V K | D L N E T I | R Y M Y E H K M | Y K M V F Y           | L E A C E S     | G S M M N   | . . . L P D D I N | V Y A T T | A A N P P               | N S Y A C Y Y D E . . . . .               | Q R S T E     | G D W . . .   | Y S V N M E D     | S D V E D         | L K E T L H K Q Y |
| P49048     | E L T N V D   | L A Y A T   | E Q M F E D N R | Y H E M L V I A D     | S C R A S M Y E | W I D S P N | . . . V L S I S   | S L T L P | E S Y S Y D V . . . . . | D T D I G V Y . . . . .                   | I D R Y T H Y | T V N . . .   | L T K E V K A L N | S S A N M         | Q D Y L           |
| O8T4E1     | E I T S Q     | E L A D I G | Q O M W E K K R | Y N E L L F M F V D T | Q A A S L Y E K | F T S P N   | . . . V L A Y A S | S L V Q V | D L S H H V . . . . .   | D P S I G V Y . . . . .                   | I D R Y T H Y | V A L E . . . | L E K V Q P . . . | F S K R T I       | G E F L           |
| O9XC9Y     | E I T N I E L | A D A F E   | Q O M W Q K R R | Y N E L L F I D T     | Q O G A S M Y E | R F Y S P N | . . . I M A I A S | S Q V Q V | D L S H Q P . . . . .   | D P A I G V H . . . . .                   | M D R Y T F V | V L E . . .   | L E E I N P . . . | A S O T N M N D L |                   |
| O92643     | E I T N I E L | A D A F E   | Q O M W Q K R R | Y N E L L F I D T     | Q O G A S M Y E | R F Y S P N | . . . I M A I A S | S Q V Q V | D L S H Q P . . . . .   | D P A I G V H . . . . .                   | M D R Y T F V | V L E . . .   | L E E I N P . . . | A S O T N M N D L |                   |
| O596L8     | E I T N I E L | A D A F E   | Q O M W Q K R R | Y N E L L F I D T     | Q O G A S M Y E | R F Y S P N | . . . I M A I A S | S Q V Q V | D L S H Q P . . . . .   | D P A I G V H . . . . .                   | M D R Y T F V | V L E . . .   | L E E I N P . . . | A S O T N M N D L |                   |
| O3MHZ7     | E I T N I E L | A D A F E   | Q O M W Q K R R | Y N E L L F I D T     | Q O G A S M Y E | R F Y S P N | . . . I M A I A S | S Q V Q V | D L S H Q P . . . . .   | D P A I G V H . . . . .                   | M D R Y T F V | V L E . . .   | L E E I N P . . . | A S O T N M N D L |                   |
| O4KKR1     | E I T N I E L | A D A F E   | Q O M W Q K R R | Y N E L L F I D T     | Q O G A S M Y E | R F Y S P N | . . . I M A I A S | S Q V Q V | D L S H Q P . . . . .   | D P A I G V H . . . . .                   | M D R Y T F V | V L E . . .   | L E E I N P . . . | A S O T N M N D L |                   |

|            | 300      | 310           | 320       | 330      | 340   | 350          | 360        | 370     | 380        | 390     |          |           |         |     |         |          |
|------------|----------|---------------|-----------|----------|-------|--------------|------------|---------|------------|---------|----------|-----------|---------|-----|---------|----------|
| A0A0G2RI59 | NKLVKKR  | RTSNSTNTYNTGS | HVMVEYGS  | GDIKPEK  | VYLQL | GDPATV       | .NLPA      | .NQIHF  | DKLDGVN    | QRADL   | LIFLWQR  | RYKKSSSES | .TRPEI  | LR  | REITETL | THRRGH   |
| P49044     | KLVKNNR  | TI..S.EPYGS   | HVMVEYGD  | IGLSKND  | LYQLL | PNPAND       | .NNSFVDE   | TENSLK  | LRTPSAVN   | QRADL   | LIHPWKE  | KFRKAPEG  | SQKNEAF | KQ  | QVLV    | EAMSHRKH |
| P49047     | ELVKKRR  | TAGSGS.KSYGS  | HVMVEFGD  | IGLSPKEK | FLYLM | GNPADE       | .NFTFVNEN  | .S      | TRRPSRVTN  | QRADL   | LIVHFWKH | YQKAPESG  | ARKVEAQ | KQ  | QVLV    | EAMSHRHL |
| B8ASK4     | ELVKKRR  | TSNANKLNESGS  | HVMVEYGD  | ITPKDEK  | FLYQK | PNPANG       | .NFTN      | .E      | LIWPVPKATV | QRADL   | LIHFMWQR | LYQKNGVSE | DKLRA   | RE  | IEDT    | IAHRKH   |
| P49042     | SSVKARR  | TSNNTYNTAAGS  | HVMQYQGN  | QSTKADK  | LYLFG | FDPASV       | .NFFPP     | .NNAH   | LNAPMEVVN  | QRADL   | LIHFMWQV | LYKRSNGES | SEKKETL | QK  | IKDA    | IKHRSH   |
| Q24326     | QSVQKRR  | TSNFEAYAMGS   | HVMQYQGN  | QNTATAEK | LYLHG | FDPATV       | .NFFPP     | .HNGRL  | LKSMVEVN   | QRADL   | LIHFMWQV | LYQRSHHLE | PEKKTDL | QK  | IEEIV   | KHRKH    |
| P49046     | QSVQKRR  | TSNNSNYRFGS   | HVMQYQGD  | TNITAEK  | LYLHG | FDPATV       | .NFFPP     | .HNGL   | LEAKMEVN   | QRADL   | LIHFMWQV | LYQRSHHLE | PEKKTDL | EQ  | ITET    | VTKHRNH  |
| P49045     | KSVQKRR  | TSNPNFYAMGS   | HVMQYQGD  | TNITAEK  | LYLHG | FDPATV       | .NFFPP     | .QNGRL  | LTKMEVVN   | QRADL   | LIHFMWQV | LYQRSHHLE | PEKKTDL | QK  | IAETV   | KHRKH    |
| Q9R0J8     | HLVKSHTN | .TS           | HVMQYQGN  | KSISTMKV | MQFQ  | QMKHRASSP    | ISLPPVTH   | .LDLTP  | SPVPL      | ITLTKRK | LLRTNNMK | .ESQVIL   | VGQIQ   | QHL | LDARH   | IV       |
| O89017     | HLVKSHTN | .TS           | HVMQYQGN  | KSISTMKV | MQFQ  | QMKHRASSP    | ISLPPVTH   | .LDLTP  | SPVPL      | ITLTKRK | LLRTNDVK | .ESQNL    | VGQIQ   | QHL | LDARH   | IV       |
| Q9Y538     | HLVKSHTN | .TS           | HVMQYQGN  | KTISTMKV | MQFQ  | QMKRKAASSP   | VPVLPVTH   | .LDLTP  | SPVPL      | ITIMKKR | LMNTNDLE | .ESRQIT   | TEEI    | QRL | LDARH   | IV       |
| Q5R5D9     | HLVKSHTN | .TS           | HVMQYQGN  | KTISTMKV | MQFQ  | QMTMKHKAASSP | ISLPPVTH   | .LDLTP  | SPVPL      | ITIMKKR | LMNTNDLE | .ESRQIT   | TEEI    | QRL | LDARH   | IV       |
| Q95M12     | HLVKSHTN | .TS           | HVMQYQGN  | KSISAMK  | MQFQ  | QKLKHOASSP   | ISLPAVSR   | .LDLTP  | SPVPL      | SIMKKR  | LMSTNDLO | .ESRRIL   | VQKID   | RH  | LEARN   | IV       |
| P49048     | DSCPARK  | KCLSNT        | .GVRKDYHP | KDVKRRVY | TDFF  | FSGRIFQ      | .HLSEEIVL  | .TLANED | DFDIFDK    | .DK     | MY       | .TKKPE    | FKI     |     |         |          |
| Q8T4E1     | QVCPKRS  | LCVISTP       | .GVRKDLYP | RDHPKVV  | TDFF  | FSAIRPTR     | .VSTDRLNV  | .QVQSDV | DDSSSK     | .EDGTA  | EERMGE   | FKI       |         |     |         |          |
| Q9CXY9     | QVCPKRS  | LCVSTP        | .GERTDLFO | RDPKNVL  | TDFF  | FSVRKVE      | .IITETIKSL | .QVQSDV | IMESSYK    | .EDQMDE | KLMELP   | FKY       |         |     |         |          |
| Q92643     | QVCPKRS  | LCVSTP        | .GERTDLFO | RDPKNVL  | TDFF  | FSVRKVE      | .IITETIKSL | .QVQSDV | IMESSYK    | .EDQMDE | KLMELP   | FKY       |         |     |         |          |
| S56L8      | QVCPKRS  | LCVSTP        | .GERTDLFO | RDPKNVL  | TDFF  | FSVRKVE      | .IITETIKSL | .QVQSDV | IMESSYK    | .EDQMDE | KLMELP   | FKY       |         |     |         |          |
| Q3MHZ7     | QVCPKRS  | LCVSTP        | .GERTDLFO | RDPKNVL  | TDFF  | FSVRKVE      | .IITETIKSL | .QVQSDV | IMESSYK    | .EDQMDE | KLMELP   | FKY       |         |     |         |          |
| Q4KKV1     | QVCPKRS  | LCVSTP        | .GERTDLFO | RDPKNVL  | TDFF  | FSVRKVE      | .IITETIKSL | .QVQSDV | IMESSYK    | .EDQMDE | KLMELP   | FKY       |         |     |         |          |

[illegible]
