# Supplementary material for: Structural basis of ribosomal peptide macrocyclization in plants
Source: eLife journal article supplement (doi:10.7554/elife.32955), 2018-01-31

Thioacyl intermediate

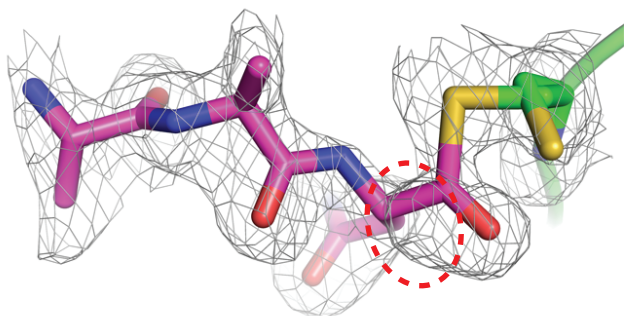

Second tetrahedral intermediate

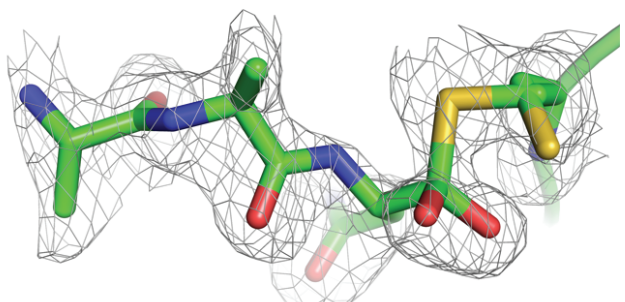

Hydrolysis product

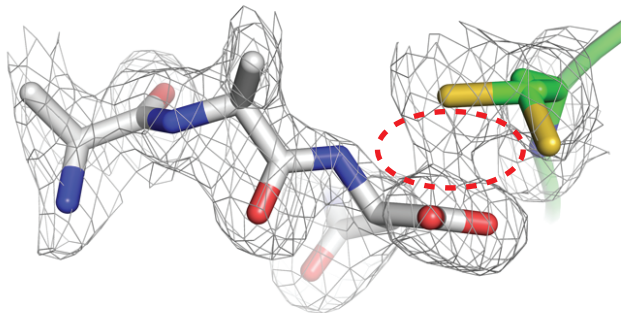

Thioacyl intermediate

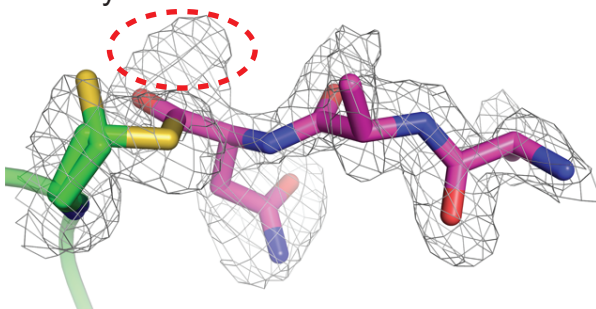

Second tetrahedral intermediate

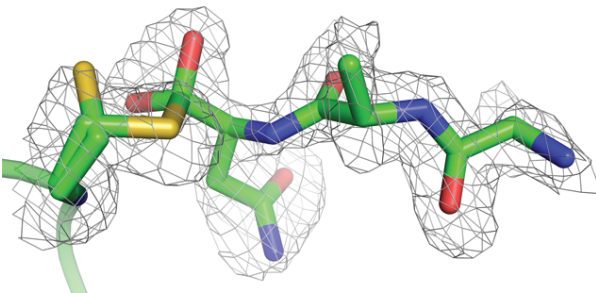

Hydrolysis product

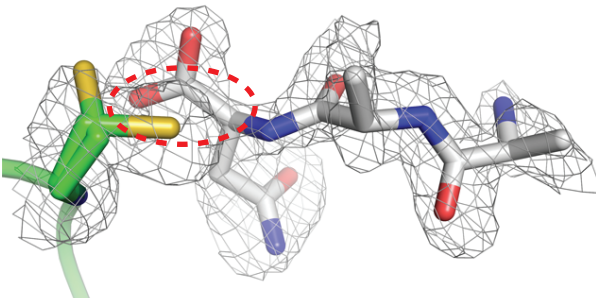

Supplement: supp [file elife-32955-supp-v1.zip › elife_poa_e32955_Figure_3_figure_supplement_2.pdf]
