# Supplementary figures and images for: Structural basis of ribosomal peptide macrocyclization in plants
Source: eLife journal article supplement (doi:10.7554/elife.32955), 2018-01-31

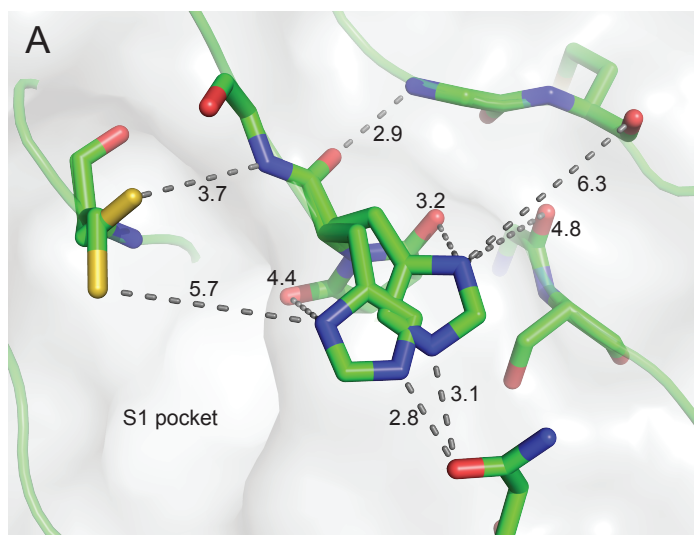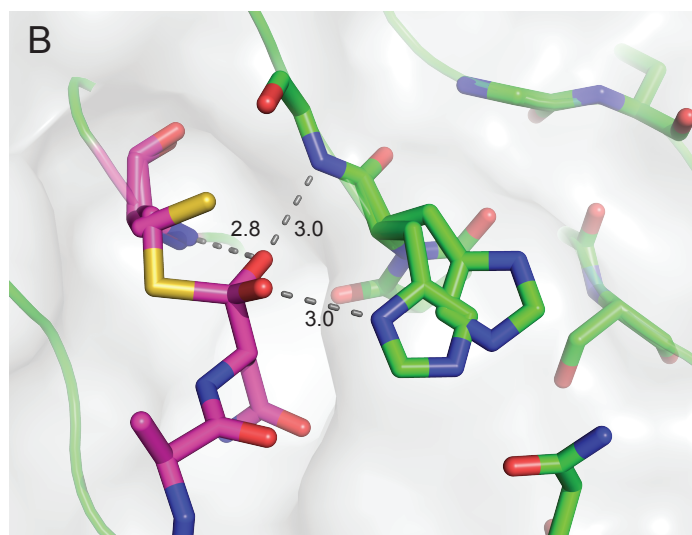

Supplement: supp [file elife-32955-supp-v1.zip › elife_poa_e32955_Figure_3_figure_supplement_1.pdf]

**A**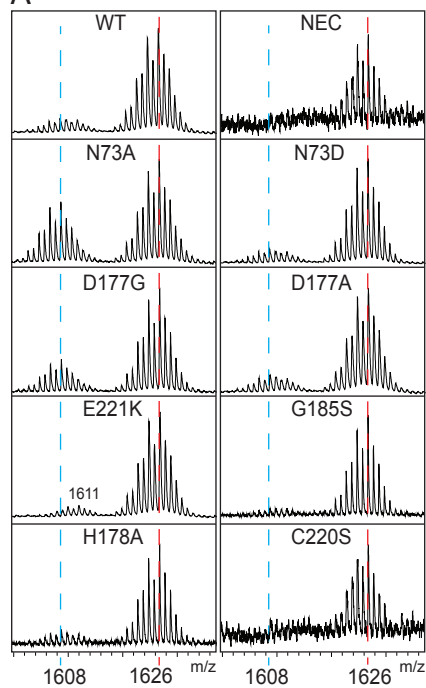**B**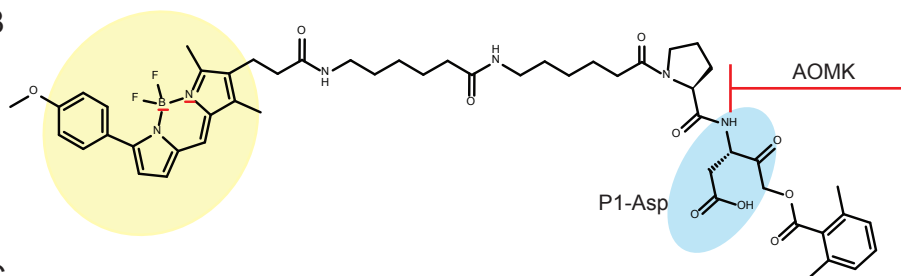**C**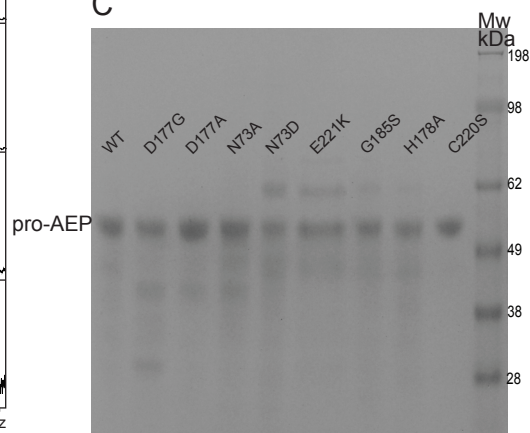**D**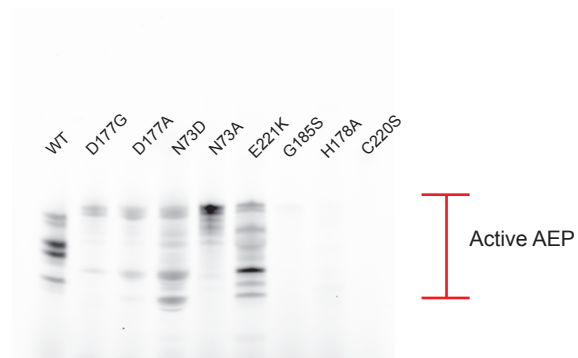

Supplement: supp [file elife-32955-supp-v1.zip › elife_poa_e32955_Figure_4_figure_supplement_1.pdf]

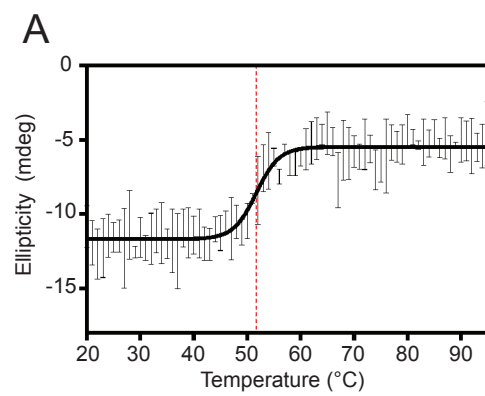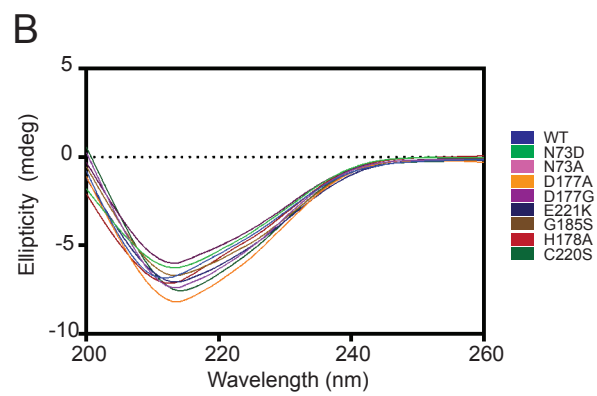

Supplement: supp [file elife-32955-supp-v1.zip › elife_poa_e32955_Figure_4_figure_supplement_3.pdf]

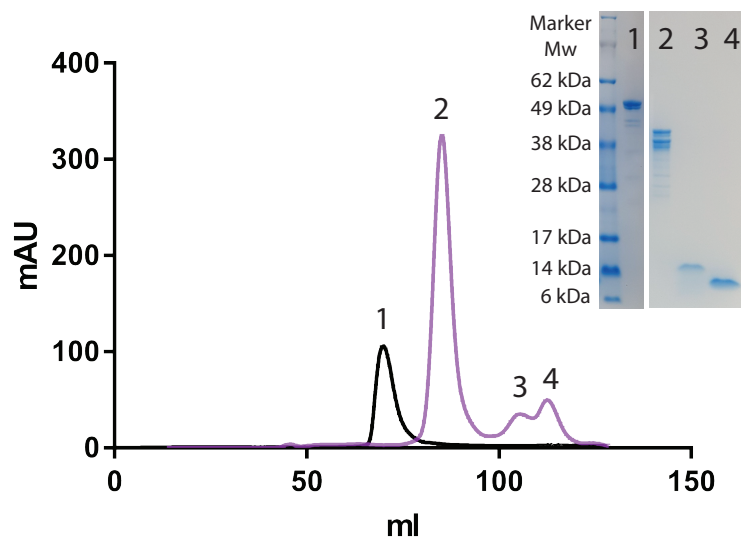

Supplement: supp [file elife-32955-supp-v1.zip › elife_poa_e32955_Figure_2_figure_supplement_1.pdf]

A

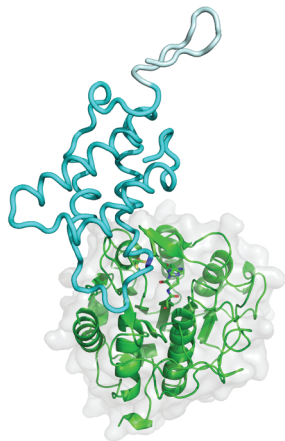

B

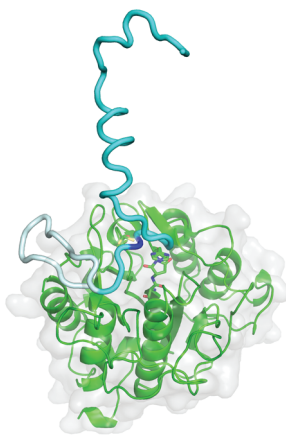

C

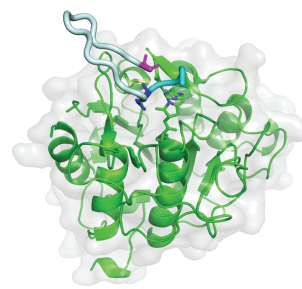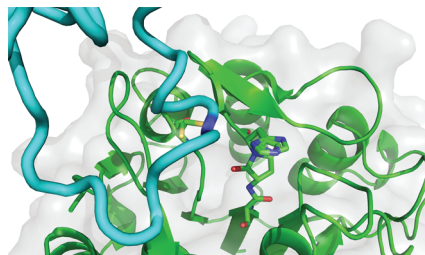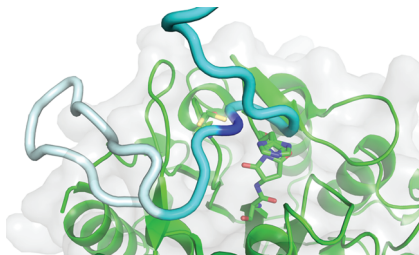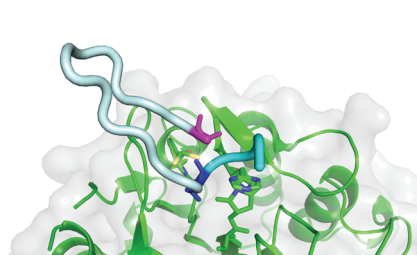

Supplement: supp [file elife-32955-supp-v1.zip › elife_poa_e32955_Figure_4_figure_supplement_2.pdf]

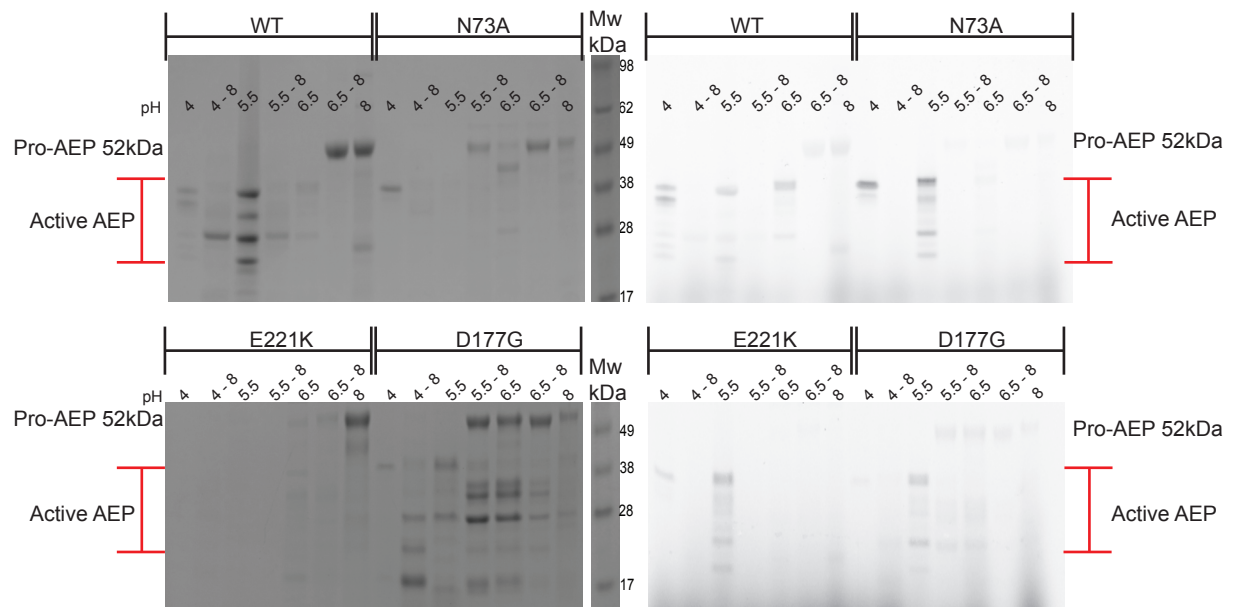

Supplement: supp [file elife-32955-supp-v1.zip › elife_poa_e32955_Figure_4_figure_supplement_4.pdf]

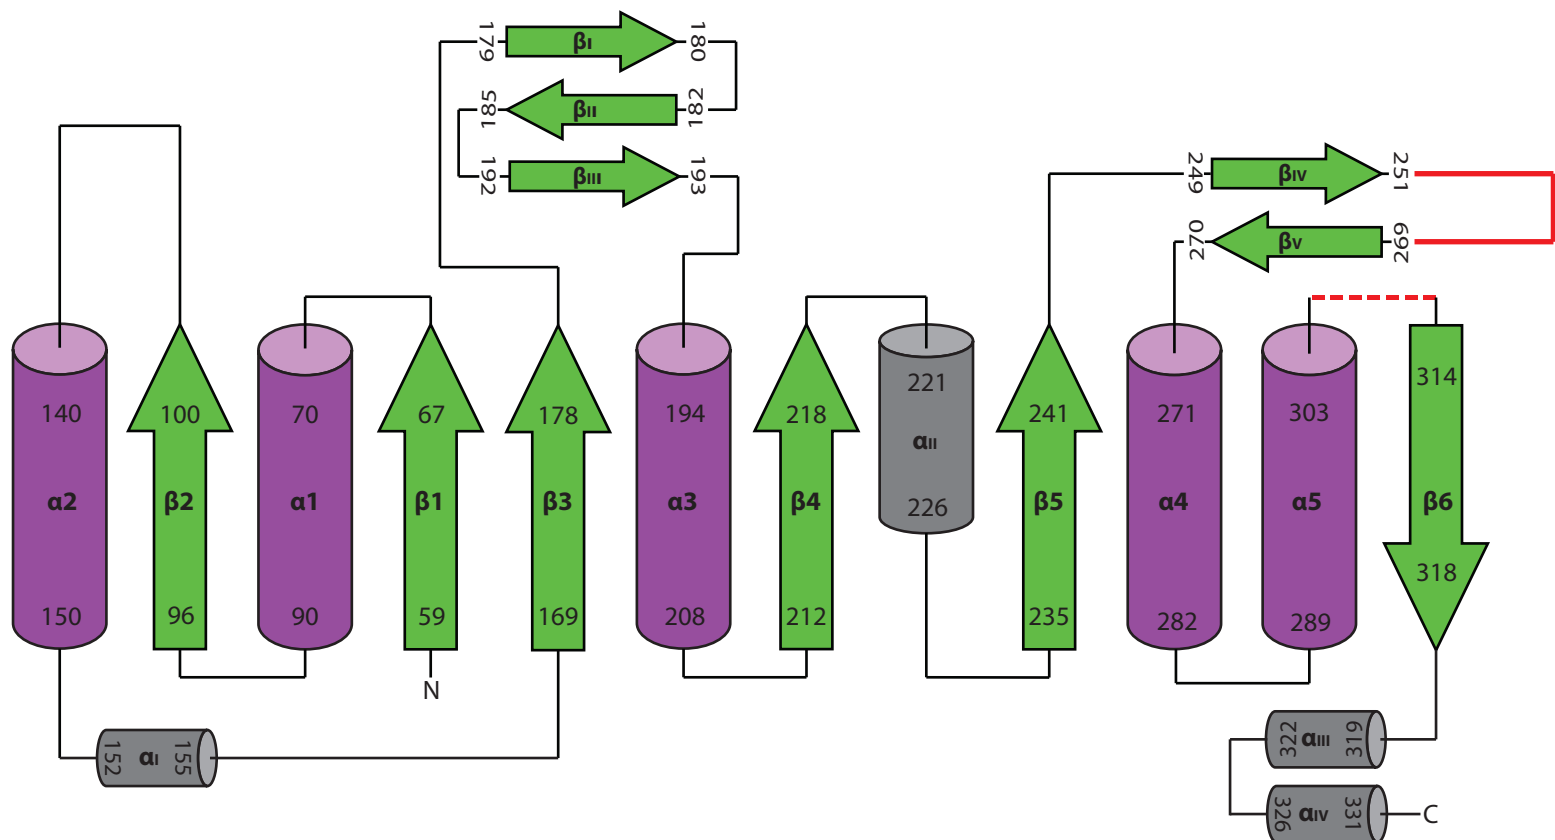

Supplement: supp [file elife-32955-supp-v1.zip › elife_poa_e32955_Figure_2_figure_supplement_3.pdf]

*H. annuus*

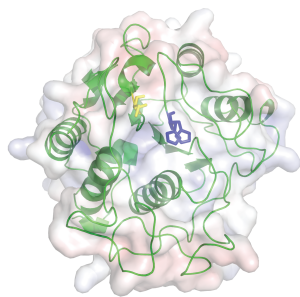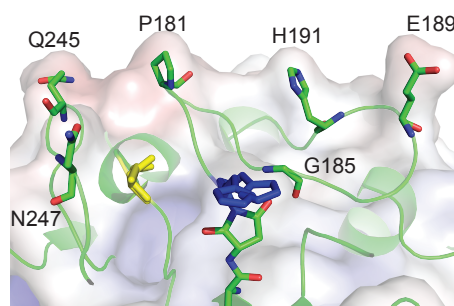

*O. affinis*

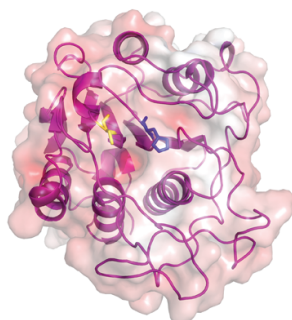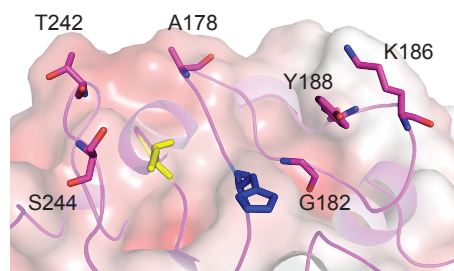

*H. sapiens*

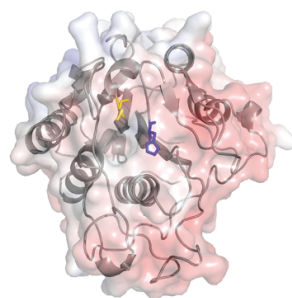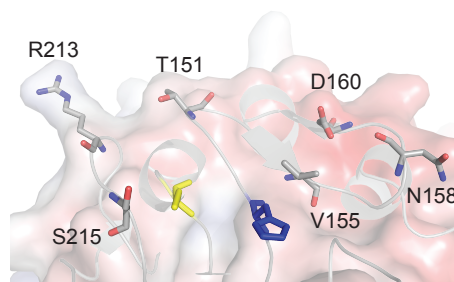

*M. musculus*

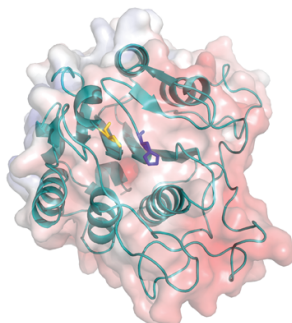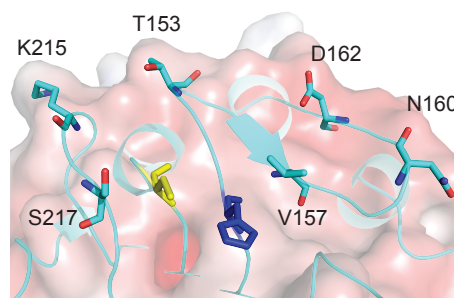

*C. ternatea*

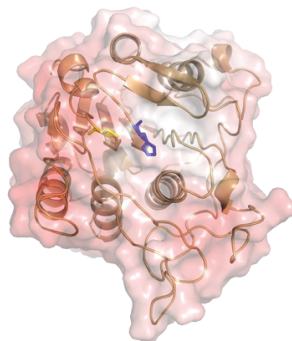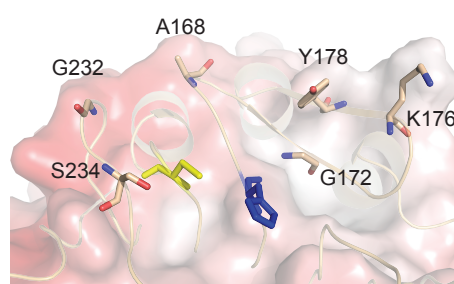

Supplement: supp [file elife-32955-supp-v1.zip › elife_poa_e32955_Figure_5_figure_supplement_1.pdf]
